# Supplementary material for: Landscape structures regulate the contrasting response of recession along rainfall amounts
Source: Copernicus journal article supplement (doi:10.5194/hess-27-4279-2023), 2023-12-06
Supplement: Supplementary file 1 [file hess-27-4279-2023-supplement.pdf]

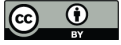

*Supplement of*

## **Landscape structures regulate the contrasting response of recession along rainfall amounts**

**Jun-Yi Lee et al.**

*Correspondence to:* Jr-Chuan Huang ([riverhuang@ntu.edu.tw](mailto:riverhuang@ntu.edu.tw))

The copyright of individual parts of the supplement might differ from the article licence.

## Supplementary Material

**Table S1.** Summary of empirical power-law recession studies. The number of references corresponds to Table 1 in the main text. The parameter  $a$  and  $\hat{a}$  represent decorrelated and original values, respectively.  $T_0$  represents recession timescale at the median flow. CTS and VTS represent constant and variable time intervals for sampling ( $Q$ ,  $dQ/dt$ ) pairs, respectively.

| No | Reference                      | Data pool          | Temporal scale          | Location       | Number of basins | Number of events | Basin area (km <sup>2</sup> ) | Unit of flow                   | Initial time of recession segment (day after $Q_p$ ) | Sampling way ( $Q$ , $dQ/dt$ ) | $b$       | Target parameters |
|----|--------------------------------|--------------------|-------------------------|----------------|------------------|------------------|-------------------------------|--------------------------------|------------------------------------------------------|--------------------------------|-----------|-------------------|
| 1  | Mathias et al. (2016)          | Point-cloud        | Long-term               | UK             | 120              | n.a.             | 1.1-1700                      | L T <sup>-1</sup>              | 0                                                    | CTS                            | 1.68-1.99 | $\hat{a}$ , b     |
| 2  | Patnaik et al. (2018)          | Median             | Long-term               | Eastern USA    | 212              | n.a.             | n.a.                          | L <sup>3</sup> T <sup>-1</sup> | 1                                                    | CTS                            | 1-6       | b                 |
| 3  | Tashie et al. (2019)           | Median             | Monthly                 | North Carolina | 1                | 382              | 0.6                           | L T <sup>-1</sup>              | 1                                                    | CTS                            | 4-20      | a, b              |
| 4  | Bart and Hope (2014)           | Events             | Event                   | California     | 4                | n.a.             | 119-632                       | L T <sup>-1</sup>              | 7                                                    | CTS                            | 1.8-2.1   | $\hat{a}$         |
| 5  | Biswal and Nagesh Kumar (2014) | Events             | Event                   | USA            | 67               | n.a.             | 10-8858                       | L <sup>3</sup> T <sup>-1</sup> | 0                                                    | CTS                            | 1.47-4.57 | $\hat{a}$         |
| 6  | Biswal and Marani (2014)       | Events             | Event                   | Eastern USA    | 4                | n.a.             | 41-583                        | L <sup>3</sup> T <sup>-1</sup> | 1                                                    | CTS                            | 1.91-2.23 | $\hat{a}$         |
| 7  | Clark et al. (2009)            | Point-cloud        | Long-term/event         | Georgia        | 3                | n.a.             | 0.001-0.41                    | L T <sup>-1</sup>              | 0                                                    | VTS                            | 1-3       | b                 |
| 8  | Ghosh et al. (2016)            | Events             | Event                   | Georgia        | 1                | 23               | 0.41                          | L T <sup>-1</sup>              | 0.25                                                 | CTS                            | 2.5-7.8   | $\hat{a}$ , b     |
| 9  | Patnaik et al. (2015)          | Median/Events      | Long-term/Event         | USA            | 358              | n.a.             | 2-3247                        | L <sup>3</sup> T <sup>-1</sup> | 7                                                    | CTS                            | n.a.      | $\hat{a}$         |
| 10 | Millares et al. (2009)         | Point-cloud        | Long-term               | Spain          | 3                | n.a.             | n.a.                          | L <sup>3</sup> T <sup>-1</sup> | 0                                                    | CTS                            | 1.15-1.30 | $\hat{a}$         |
| 11 | Sayama et al. (2011)           | Point-cloud        | Long-term               | California     | 17               | n.a.             | 3-112                         | L T <sup>-1</sup>              | 0                                                    | CTS                            | n.a.      | b                 |
| 12 | Shaw and Riha (2012)           | Events             | Event                   | New York       | 7                | 80               | 100-6415                      | L <sup>3</sup> T <sup>-1</sup> | 0                                                    | VTS                            | 1.31-5.34 | $\hat{a}$         |
| 13 | Shaw et al. (2013)             | Events             | Event                   | New York       | 9                | 72               | 287                           | L <sup>3</sup> T <sup>-1</sup> | 0                                                    | VTS                            | 0.98-2.42 | $\hat{a}$         |
| 14 | Tague et al. (2004)            | Point-cloud        | Long-term               | Oregon         | 22               | n.a.             | 7.3-1337                      | L <sup>3</sup> T <sup>-1</sup> | 0                                                    | CTS                            | 1.38-3.16 | $\hat{a}$ , b     |
| 15 | Tashie et al. (2020)           | Events             | Event                   | USA            | 1027             | 155309           | n.a.                          | L <sup>3</sup> T <sup>-1</sup> | 0                                                    | CTS                            | 1.1-7.3   | b                 |
| 16 | Yan et al. (2022)              | Point-cloud        | Long-term               | Eastern China  | 382              | n.a.             | 34-18211                      | L <sup>3</sup> T <sup>-1</sup> | 2                                                    | CTS                            | 0.57-3    | $\hat{a}$ , b     |
| 17 | Ye et al. (2014)               | Point-cloud        | Long-term               | Eastern USA    | 50               | n.a.             | 66-9062                       | L T <sup>-1</sup>              | 3                                                    | CTS                            | 0.99-1.91 | $\hat{a}$ , b     |
| 18 | McMillan et al. (2014)         | Median/Point-cloud | Long-term/monthly/event | New Zealand    | 28               | n.a.             | n.a.                          | L T <sup>-1</sup>              | 0.5                                                  | VTS                            | 1.5-4.0   | $T_0$ , b         |
| 19 | Biswal and Nagesh Kumar (2013) | Events             | Event                   | USA            | 39               | 5486             | 9.6-5457                      | L <sup>3</sup> T <sup>-1</sup> | 0                                                    | CTS                            | 1.52-2.61 | b                 |
| 20 | Chen and Krajewski (2015)      | Events             | Event                   | Iowa           | 25               | n.a.             | 66-16854                      | L T <sup>-1</sup>              | 12                                                   | CTS                            | 0.75-1.6  | $\hat{a}$ , b     |
| 21 | Bogaart et al. (2016)          | Point-cloud        | Annual                  | Sweden         | 316              | n.a.             | 3-33000                       | L T <sup>-1</sup>              | 3                                                    | CTS                            | 0.5-2.1   | $\hat{a}$ , b     |

|                          |        |                |                   |    |      |         |              |      |     |          |                    |
|--------------------------|--------|----------------|-------------------|----|------|---------|--------------|------|-----|----------|--------------------|
| 22 Dralle et al. (2017)  | Events | Event          | California/Oregon | 16 | n.a. | 17-5457 | $L^3 T^{-1}$ | vary | CTS | 0.1-3.7  | a                  |
| 23 Santos et al. (2019)  | Events | Annual/Event   | Switzerland       | 5  | n.a. | 50-352  | $L T^{-1}$   | vary | CTS | 1.73-2.4 | a, b               |
| 24 Karlsen et al. (2019) | Events | Seasonal/Event | Northern Sweden   | 14 | 163  | 12-6790 | $L T^{-1}$   | 2    | VTS | 1-10     | T <sub>0</sub> , b |

**Table S2.** Landscape and landcover variables of the selected catchments.

| ID  | HID      | <i>H</i><br>(m) | <i>L</i><br>(m) | <i>G</i><br>(-) | <i>L/G</i><br>(m) | <i>A</i><br>(km <sup>2</sup> ) | <i>DD</i><br>(km/km <sup>2</sup> ) | <i>S<sub>m</sub></i><br>(%) | <i>HI</i><br>(-) | <i>ELO</i><br>(-) | <i>C<sub>w</sub></i><br>(%) | <i>C<sub>F</sub></i><br>(%) | <i>C<sub>A</sub></i><br>(%) |
|-----|----------|-----------------|-----------------|-----------------|-------------------|--------------------------------|------------------------------------|-----------------------------|------------------|-------------------|-----------------------------|-----------------------------|-----------------------------|
| W1  | 1140H085 | 91              | 256.1           | 0.38            | 699.3             | 110                            | 0.994                              | 1.33                        | 0.395            | 0.386             | 1.0                         | 90.7                        | 4.8                         |
| W2  | 1140H086 | 124             | 260.0           | 0.48            | 549.2             | 79                             | 0.933                              | 1.86                        | 0.423            | 0.456             | 0.6                         | 68.5                        | 1.5                         |
| W3  | 1300H013 | 169             | 291.2           | 0.57            | 526.7             | 147                            | 0.875                              | 7.63                        | 0.381            | 0.686             | 1.0                         | 89.9                        | 4.3                         |
| W4  | 1340H008 | 74              | 247.4           | 0.38            | 712.3             | 298                            | 1.037                              | 3.99                        | 0.214            | 0.427             | 1.4                         | 80.9                        | 9.9                         |
| W5  | 1350H001 | 127             | 260.8           | 0.51            | 557.7             | 244                            | 1.073                              | 4.56                        | 0.266            | 0.503             | 0.8                         | 83.3                        | 10.4                        |
| W6  | 1350H012 | 77              | 241.7           | 0.37            | 764.5             | 471                            | 1.030                              | 2.84                        | 0.208            | 0.394             | 1.4                         | 74.6                        | 13.5                        |
| W7  | 1420H034 | 208             | 286.4           | 0.72            | 404.8             | 105                            | 0.856                              | 10.19                       | 0.355            | 0.648             | 0.9                         | 92.1                        | 3.3                         |
| W8  | 1430H028 | 36              | 201.0           | 0.22            | 1109.3            | 265                            | 1.191                              | 1.18                        | 0.203            | 0.545             | 2.4                         | 41.1                        | 29.4                        |
| W9  | 1430H030 | 131             | 269.1           | 0.55            | 561.0             | 1043                           | 0.962                              | 2.36                        | 0.285            | 0.399             | 1.1                         | 69.0                        | 20.6                        |
| W10 | 1510H063 | 204             | 277.8           | 0.74            | 383.6             | 2089                           | 0.924                              | 2.22                        | 0.432            | 0.421             | 0.5                         | 84.8                        | 4.3                         |
| W11 | 1540H014 | 7               | 200.0           | 0.05            | 3200.0            | 83                             | 1.285                              | 2.85                        | 0.097            | 0.304             | 0.0                         | 25.0                        | 7.7                         |
| W12 | 1540H029 | 4               | 180.0           | 0.03            | 3600.0            | 220                            | 1.539                              | 1.14                        | 0.103            | 0.424             | 3.0                         | 18.8                        | 53.2                        |
| W13 | 1580H001 | 148             | 282.8           | 0.52            | 545.3             | 81                             | 1.157                              | 6.66                        | 0.391            | 0.541             | 1.9                         | 11.8                        | 70.9                        |
| W14 | 1660H010 | 23              | 208.8           | 0.12            | 1951.2            | 140                            | 1.350                              | 0.29                        | 0.182            | 0.338             | 3.0                         | 56.2                        | 22.4                        |
| W15 | 1730H031 | 211             | 280.7           | 0.75            | 375.9             | 812                            | 0.915                              | 3.09                        | 0.426            | 0.321             | 0.7                         | 85.5                        | 3.1                         |
| W16 | 2200H011 | 167             | 268.3           | 0.65            | 457.1             | 1573                           | 0.919                              | 2.36                        | 0.383            | 0.433             | 2.6                         | 59.2                        | 19.4                        |
| W17 | 2370H017 | 157             | 260.8           | 0.65            | 475.8             | 1527                           | 0.945                              | 2.91                        | 0.329            | 0.459             | 1.9                         | 79.7                        | 9.5                         |
| W18 | 2420H043 | 148             | 260.0           | 0.64            | 518.7             | 563                            | 1.015                              | 4.51                        | 0.349            | 0.445             | 1.0                         | 75.5                        | 12.1                        |
| W19 | 2560H001 | 188             | 269.1           | 0.69            | 424.9             | 450                            | 0.934                              | 5.25                        | 0.335            | 0.473             | 1.9                         | 88.8                        | 2.3                         |

Here, *H* is the median of flow-path heights, *L* is the median of flow-path lengths, *G* is the median of flow-path gradients, *L/G* is the median of ratios between flow-path length and gradient. *A* is the drainage area, *DD* is the drainage density, *S<sub>m</sub>* is the gradient of main stem, *HI* is the hypsometric integral, *ELO* is the basin elongation, *C<sub>w</sub>*, *C<sub>F</sub>*, *C<sub>A</sub>* is the coverage of water body, forest, and agricultural land, respectively.

**Table S3.** Definition and calculation of hydrologic event and landscape variables.

| Variable                                | Definition and meaning                                                                                                                             | Calculation method                                                                                                                                                  |
|-----------------------------------------|----------------------------------------------------------------------------------------------------------------------------------------------------|---------------------------------------------------------------------------------------------------------------------------------------------------------------------|
| <b>Hydrologic event</b>                 |                                                                                                                                                    |                                                                                                                                                                     |
| $AP_{7\text{day}}$ [mm]                 | 7-day antecedent precipitation, used to assess the saturation status of the watershed before the rainstorm.                                        | Sum of rainfall amounts over the previous seven days leading up to the start of the rising limb.                                                                    |
| $P$ [mm]                                | Total precipitation.                                                                                                                               | Sum of rainfall amounts throughout the defined cumulative rainfall window <sup>a</sup>                                                                              |
| $D$ [hr]                                | Duration of precipitation.                                                                                                                         | Length of the cumulative rainfall window                                                                                                                            |
| $I_{\text{avg}}$ [mm hr <sup>-1</sup> ] | Averaged precipitation intensity.                                                                                                                  | $P/D$                                                                                                                                                               |
| $Q_{\text{tot}}$ [mm]                   | Total specific discharge.                                                                                                                          | Total discharge divided by the drainage area.                                                                                                                       |
| $Q_{\text{ant}}$ [mm]                   | Antecedent streamflow. Recorded flow rate before the start of the rising limb.                                                                     |                                                                                                                                                                     |
| $Q_p$ [mm]                              | Peak flow. The highest recorded flow rate during a rainstorm.                                                                                      |                                                                                                                                                                     |
| $Q_{\text{tot}}/P$ [-]                  | Ratio of total streamflow to precipitation, also called runoff coefficient. It indicates the efficiency of the conversion from rainfall to runoff. |                                                                                                                                                                     |
| <b>Landscape</b>                        |                                                                                                                                                    |                                                                                                                                                                     |
| $H$ [m]                                 | Median of flow path heights, which is related to the potential energy of water.                                                                    | Compute the elevation differences between hillslope cells and stream cell along the flow path. Then, determine the median of these difference across the catchment. |
| $L$ [m]                                 | Median of flow path lengths, which is related to flow accumulation from hillslopes.                                                                | Compute the distances between hillslope cells and stream cell along the flow path. Then, determine the median of these distances across the catchment.              |
| $G$ [-]                                 | Median of flow path gradients, which could be regarded as a surrogate of flow velocity.                                                            | Calculate the gradients between hillslope cells and the stream cell along the flow path. Then, ascertain the median of these gradients across the catchment.        |
| $L/G$ [m]                               | Median of ratios between flow-path length and gradient, which is related to the mean residence time.                                               | Calculate the ratios of flow path length to gradient for each cell, and subsequently, determine the median of these ratios across the entire catchment.             |
| $A$ [km <sup>2</sup> ]                  | Drainage area, which could be linked to how much total water volume could be stored.                                                               | Total area of cells that can route to the outlet.                                                                                                                   |
| $DD$ [km km <sup>-2</sup> ]             | Drainage density. It is related to how fast the catchment can drain water via stream.                                                              | Ratio of total stream length to the drainage area                                                                                                                   |
| $S_m$ [%]                               | Gradient of main stem, which is related to water velocity in main stem.                                                                            | The changes in elevation along the main stem.                                                                                                                       |
| $HI$ [-]                                | Hypsometric integral. It represents how much a catchment can contain water storage.                                                                | Calculate the area under the hypsometric curve, which relates elevation and cumulative area                                                                         |
| $ELO$ [-]                               | Basin elongation measures catchment shape and affects surface flow travel time.                                                                    | Measure the ratio of the length of the longest axis of a catchment to the length of the perpendicular axis across it.                                               |
| $C_w$ [%]                               | Water body coverage, which is negatively related to the recession exponent.                                                                        | Percentage of the area of water bodies divided by drainage area.                                                                                                    |
| $C_F$ [%]                               | Forest coverage, which is negatively related to the recession coefficient.                                                                         | Percentage of the forest area divided by drainage area.                                                                                                             |
| $C_A$ [%]                               | Agricultural land coverage, which is related to the field capacity.                                                                                | Percentage of the agricultural area divided by drainage area.                                                                                                       |

<sup>a</sup>Cumulative rainfall window is defined as the elapsed time from 6 h before the rising flow to the peak flow.

<sup>b</sup>Flow path is defined as the trajectory taken by water from a hillslope grid point, as it follows the surface flow direction toward the channel.

**Table S4.** Descriptions of the selected catchments and events

| ID      | HID      | N  | $AP_{7\text{day}}$ (mm) |     |     | $P$ (mm) |     |      | $I_{\text{avg}}$ (mm h <sup>-1</sup> ) |     |      | $Q_{\text{ant}}$ (mm h <sup>-1</sup> ) |      |      | $Q_{\text{tot}}$ (mm) |     |      | $Q_{\text{p}}$ (mm h <sup>-1</sup> ) |     |      | $Q_{\text{tot}}/P$ (-) |      |      |
|---------|----------|----|-------------------------|-----|-----|----------|-----|------|----------------------------------------|-----|------|----------------------------------------|------|------|-----------------------|-----|------|--------------------------------------|-----|------|------------------------|------|------|
|         |          |    | median                  | min | max | median   | min | max  | median                                 | min | max  | median                                 | min  | max  | median                | min | max  | median                               | min | max  | median                 | min  | max  |
| W1      | 1140H085 | 15 | 70                      | 3   | 282 | 246      | 131 | 904  | 7.3                                    | 3.7 | 11.7 | 0.32                                   | 0.02 | 2.35 | 205                   | 100 | 697  | 8.7                                  | 4.9 | 27.2 | 0.76                   | 0.49 | 1.05 |
| W2      | 1140H086 | 18 | 60                      | 1   | 294 | 272      | 98  | 854  | 7.1                                    | 3.1 | 17.5 | 0.24                                   | 0.02 | 1.91 | 190                   | 99  | 650  | 8.8                                  | 4.6 | 27.1 | 0.80                   | 0.52 | 1.04 |
| W3      | 1300H013 | 16 | 56                      | 3   | 248 | 239      | 25  | 1012 | 10.0                                   | 5.6 | 23.6 | 0.34                                   | 0.07 | 2.16 | 111                   | 26  | 537  | 8.6                                  | 0.9 | 37.5 | 0.52                   | 0.26 | 1.02 |
| W4      | 1340H008 | 21 | 51                      | 0   | 498 | 206      | 58  | 865  | 7.4                                    | 3.9 | 21.6 | 0.13                                   | 0.01 | 1.06 | 122                   | 16  | 670  | 12.6                                 | 1.6 | 31.8 | 0.71                   | 0.23 | 1.00 |
| W5      | 1350H001 | 20 | 53                      | 0   | 272 | 352      | 127 | 1247 | 5.4                                    | 1.3 | 13.4 | 0.19                                   | 0.05 | 0.89 | 191                   | 51  | 749  | 10.5                                 | 2.4 | 52.2 | 0.61                   | 0.20 | 0.94 |
| W6      | 1350H012 | 18 | 45                      | 9   | 489 | 336      | 155 | 596  | 5.9                                    | 3.5 | 11.3 | 0.14                                   | 0.01 | 0.86 | 221                   | 55  | 424  | 8.0                                  | 2.1 | 32.9 | 0.54                   | 0.24 | 1.06 |
| W7      | 1420H034 | 11 | 38                      | 4   | 186 | 558      | 189 | 651  | 10.3                                   | 5.4 | 12.1 | 0.34                                   | 0.08 | 1.03 | 302                   | 104 | 691  | 11.9                                 | 4.9 | 22.8 | 0.63                   | 0.32 | 1.08 |
| W8      | 1430H028 | 26 | 81                      | 4   | 355 | 343      | 89  | 934  | 6.5                                    | 3.6 | 13.8 | 0.23                                   | 0.12 | 0.46 | 138                   | 38  | 458  | 13.6                                 | 4.0 | 65.4 | 0.41                   | 0.21 | 0.70 |
| W9      | 1430H030 | 13 | 84                      | 3   | 923 | 415      | 87  | 674  | 4.7                                    | 1.9 | 8.7  | 0.40                                   | 0.11 | 0.76 | 150                   | 43  | 446  | 3.6                                  | 1.5 | 14.0 | 0.34                   | 0.23 | 1.03 |
| W10     | 1510H063 | 15 | 31                      | 8   | 102 | 471      | 105 | 1276 | 6.2                                    | 2.6 | 10.4 | 0.11                                   | 0.05 | 0.70 | 237                   | 46  | 964  | 5.8                                  | 1.6 | 19.1 | 0.51                   | 0.21 | 0.91 |
| W11     | 1540H014 | 9  | 80                      | 17  | 187 | 164      | 85  | 364  | 7.1                                    | 3.0 | 10.3 | 0.25                                   | 0.03 | 0.63 | 137                   | 30  | 304  | 13.0                                 | 3.2 | 22.2 | 0.73                   | 0.36 | 1.10 |
| W12     | 1540H029 | 12 | 69                      | 13  | 237 | 158      | 28  | 581  | 6.2                                    | 4.0 | 11.9 | 0.33                                   | 0.19 | 0.70 | 112                   | 16  | 591  | 8.4                                  | 1.6 | 28.1 | 0.75                   | 0.27 | 1.02 |
| W13     | 1580H001 | 24 | 65                      | 2   | 396 | 712      | 61  | 2558 | 9.7                                    | 4.2 | 20.3 | 0.44                                   | 0.04 | 1.27 | 368                   | 37  | 1736 | 24.9                                 | 1.6 | 84.5 | 0.56                   | 0.25 | 1.08 |
| W14     | 1660H010 | 17 | 80                      | 11  | 707 | 201      | 24  | 982  | 6.6                                    | 3.2 | 13.6 | 0.16                                   | 0.02 | 3.22 | 137                   | 14  | 946  | 11.7                                 | 1.7 | 27.4 | 0.72                   | 0.31 | 1.10 |
| W15     | 1730H031 | 10 | 106                     | 26  | 317 | 507      | 186 | 820  | 7.6                                    | 4.8 | 17.0 | 0.28                                   | 0.11 | 0.66 | 254                   | 101 | 628  | 9.8                                  | 2.2 | 28.8 | 0.67                   | 0.38 | 1.00 |
| W16     | 2200H011 | 10 | 66                      | 21  | 175 | 236      | 65  | 716  | 4.9                                    | 2.4 | 9.4  | 0.20                                   | 0.03 | 0.92 | 156                   | 27  | 583  | 5.2                                  | 1.0 | 18.8 | 0.67                   | 0.25 | 0.99 |
| W17     | 2370H017 | 10 | 28                      | 4   | 124 | 456      | 225 | 840  | 5.2                                    | 4.4 | 10.8 | 0.10                                   | 0.05 | 0.68 | 369                   | 59  | 512  | 10.9                                 | 2.6 | 21.3 | 0.76                   | 0.22 | 1.11 |
| W18     | 2420H043 | 21 | 49                      | 0   | 358 | 333      | 102 | 813  | 4.9                                    | 2.7 | 13.8 | 0.30                                   | 0.01 | 0.85 | 187                   | 34  | 602  | 10.1                                 | 1.5 | 47.6 | 0.58                   | 0.28 | 0.98 |
| W19     | 2560H001 | 5  | 58                      | 48  | 59  | 255      | 196 | 484  | 5.0                                    | 4.1 | 9.5  | 0.12                                   | 0.03 | 0.46 | 109                   | 82  | 277  | 4.9                                  | 2.0 | 11.5 | 0.43                   | 0.42 | 0.57 |
| Average |          |    | 62                      |     |     | 340      |     |      | 6.7                                    |     |      | 0.24                                   |      |      | 194                   |     |      | 10.1                                 |     |      | 0.61                   |      |      |

\*ID is the identifier of catchments in this study, HID is the identifier of catchments named by the Taiwan Water Resource Agency, N is the number of events. Values in each column present the median and range of the events in the corresponding catchments. Numbers in parentheses indicate the lower and upper limit among the events in the specific catchment.

**Table S5.** Median, minimum, and maximum values of the recession coefficient and exponent for each catchment.

| ID  | HID      | $a$ [ $\text{hr}^{-1}$ ] |       |       | $b$ [-] |      |      | $1/a$ [h] |      |       |
|-----|----------|--------------------------|-------|-------|---------|------|------|-----------|------|-------|
|     |          | median                   | min   | max   | median  | min  | max  | median    | min  | max   |
| W1  | 1140H085 | 0.033                    | 0.019 | 0.067 | 1.73    | 1.30 | 2.38 | 30.0      | 14.9 | 53.7  |
| W2  | 1140H086 | 0.035                    | 0.018 | 0.049 | 1.82    | 1.30 | 2.38 | 28.8      | 20.4 | 54.2  |
| W3  | 1300H013 | 0.046                    | 0.011 | 0.156 | 1.94    | 1.00 | 2.74 | 21.9      | 6.4  | 93.8  |
| W4  | 1340H008 | 0.074                    | 0.028 | 0.172 | 1.62    | 1.19 | 1.99 | 13.6      | 5.8  | 35.2  |
| W5  | 1350H001 | 0.022                    | 0.010 | 0.094 | 1.96    | 1.62 | 2.53 | 45.0      | 10.7 | 95.5  |
| W6  | 1350H012 | 0.068                    | 0.020 | 0.129 | 1.56    | 0.90 | 1.92 | 14.6      | 7.8  | 50.0  |
| W7  | 1420H034 | 0.016                    | 0.010 | 0.041 | 1.92    | 1.58 | 2.37 | 62.5      | 24.3 | 102.2 |
| W8  | 1430H028 | 0.068                    | 0.025 | 0.166 | 1.63    | 1.26 | 2.39 | 14.6      | 6.0  | 40.3  |
| W9  | 1430H030 | 0.026                    | 0.010 | 0.102 | 2.34    | 1.37 | 2.98 | 37.9      | 9.8  | 99.4  |
| W10 | 1510H063 | 0.031                    | 0.013 | 0.116 | 1.51    | 1.12 | 2.05 | 32.6      | 8.7  | 77.4  |
| W11 | 1540H014 | 0.110                    | 0.048 | 0.144 | 1.30    | 0.95 | 1.60 | 9.1       | 6.9  | 21.0  |
| W12 | 1540H029 | 0.089                    | 0.052 | 0.156 | 1.63    | 0.91 | 2.95 | 11.2      | 6.4  | 19.4  |
| W13 | 1580H001 | 0.031                    | 0.003 | 0.273 | 1.67    | 1.19 | 4.39 | 32.2      | 3.7  | 303.8 |
| W14 | 1660H010 | 0.094                    | 0.049 | 0.218 | 1.29    | 1.05 | 1.63 | 10.6      | 4.6  | 20.6  |
| W15 | 1730H031 | 0.025                    | 0.009 | 0.087 | 1.71    | 1.25 | 2.39 | 40.1      | 11.5 | 108.8 |
| W16 | 2200H011 | 0.036                    | 0.026 | 0.164 | 1.74    | 1.32 | 1.96 | 28.1      | 6.1  | 38.0  |
| W17 | 2370H017 | 0.029                    | 0.015 | 0.087 | 1.67    | 1.16 | 1.95 | 34.6      | 11.6 | 64.9  |
| W18 | 2420H043 | 0.054                    | 0.020 | 0.180 | 1.60    | 0.97 | 2.21 | 18.4      | 5.6  | 49.0  |
| W19 | 2560H001 | 0.055                    | 0.021 | 0.202 | 1.30    | 1.05 | 1.72 | 18.1      | 5.0  | 47.1  |

## References

- Bart, R., & Hope, A.: Inter-seasonal variability in baseflow recession rates: The role of aquifer antecedent storage in central California watersheds. *Journal of Hydrology*, 519, 205-213, <https://doi.org/10.1016/j.jhydrol.2014.07.020>, 2014.
- 25 Biswal, B., & Marani, M.: 'Universal' recession curves and their geomorphological interpretation. *Advances in Water Resources*, 65, 34-42, <https://doi.org/10.1016/j.advwatres.2014.01.004>, 2014.
- Biswal, B., & Nagesh Kumar, D.: A general geomorphological recession flow model for river basins. *Water Resources Research*, 49(8), 4900-4906, <https://doi.org/10.1002/wrcr.20379>, 2013.
- 30 Biswal, B., & Nagesh Kumar, D.: Study of dynamic behaviour of recession curves. *Hydrological Processes*, 28(3), 784-792, <https://doi.org/10.1002/hyp.9604>, 2014.
- Bogaart, P. W., van der Velde, Y., Lyon, S. W., and Dekker, S. C.: Streamflow recession patterns can help unravel the role of climate and humans in landscape co-evolution, *Hydrol. Earth Syst. Sci.*, 20, 1413–1432, <https://doi.org/10.5194/hess-20-1413-2016>, 2016.
- Chen, B., & Krajewski, W. F.: Recession analysis across scales: The impact of both random and nonrandom spatial variability on aggregated hydrologic response. *Journal of Hydrology*, 523, 97-106, <https://doi.org/10.1016/j.jhydrol.2015.01.049>, 2015.
- 35 Clark, M. P., Rupp, D. E., Woods, R. A., Tromp-van Meerveld, H. J., Peters, N. E., & Freer, J. E.: Consistency between hydrological models and field observations: linking processes at the hillslope scale to hydrological responses at the watershed scale. *Hydrological Processes: An International Journal*, 23(2), 311-319, <https://doi.org/10.1002/hyp.7154>, 2009
- Dralle, D. N., Karst, N. J., Charalampous, K., Veenstra, A., and Thompson, S. E.: Event-scale power law recession analysis: quantifying methodological uncertainty, *Hydrol. Earth Syst. Sci.*, 21, 65–81, <https://doi.org/10.5194/hess-21-65-2017>, 2017.
- 40 Ghosh, D. K., Wang, D., & Zhu, T.: On the transition of base flow recession from early stage to late stage. *Advances in Water Resources*, 88, 8-13, <https://doi.org/10.1016/j.advwatres.2015.11.015>, 2016.
- Karlsen, R. H., Bishop, K., Grabs, T., Ottosson-Löfvenius, M., Laudon, H., & Seibert, J.: The role of landscape properties, storage and evapotranspiration on variability in streamflow recessions in a boreal catchment. *Journal of Hydrology*, 570, 315-328, <https://doi.org/10.1016/j.jhydrol.2018.12.065>, 2019.
- 45 Mathias, S. A., McIntyre, N., Oughton, R. H.: A study of non-linearity in rainfall-runoff response using 120 UK catchments. *Journal of Hydrology*, 540, 423-436, <https://doi.org/10.1016/j.jhydrol.2016.06.039>, 2016.
- McMillan, H., Gueguen, M., Grimon, E., Woods, R., Clark, M., & Rupp, D. E.: Spatial variability of hydrological processes and model structure diagnostics in a 50 km<sup>2</sup> catchment. *Hydrological Processes*, 28(18), 4896-4913, <https://doi.org/10.1002/hyp.9988>, 2014.



- 50 Millares, A., Polo, M. J., and Losada, M. A.: The hydrological response of baseflow in fractured mountain areas, *Hydrol. Earth Syst. Sci.*, 13, 1261–1271, <https://doi.org/10.5194/hess-13-1261-2009>, 2009.
- Patnaik, S., Biswal, B., Kumar, D. N., & Sivakumar, B.: Effect of catchment characteristics on the relationship between past discharge and the power law recession coefficient. *Journal of Hydrology*, 528, 321-328, <https://doi.org/10.1016/j.jhydrol.2015.06.032>, 2015.
- Patnaik, S., Biswal, B., Nagesh Kumar, D., & Sivakumar, B.: Regional variation of recession flow power-law exponent. *Hydrological Processes*, 32(7), 866-872, <https://doi.org/10.1002/hyp.11441>, 2018.
- 55 Santos, A. C., Portela, M. M., Rinaldo, A., & Schaefer, B.: Estimation of streamflow recession parameters: New insights from an analytic streamflow distribution model. *Hydrological processes*, 33(11), 1595-1609, <https://doi.org/10.1002/hyp.13425>, 2019.
- Sayama, T., McDonnell, J. J., Dhakal, A., & Sullivan, K.: How much water can a watershed store?. *Hydrological Processes*, 25(25), 3899-3908, <https://doi.org/10.1002/hyp.8288>, 2011.
- 60 Shaw, S. B., & Riha, S. J.: Examining individual recession events instead of a data cloud: Using a modified interpretation of  $dQ/dt-Q$  streamflow recession in glaciated watersheds to better inform models of low flow. *Journal of hydrology*, 434, 46-54, <https://doi.org/10.1016/j.jhydrol.2012.02.034>, 2012.
- Shaw, S. B., McHardy, T. M., & Riha, S. J.: Evaluating the influence of watershed moisture storage on variations in base flow recession rates during prolonged rain-free periods in medium-sized catchments in New York and Illinois, USA. *Water Resources Research*, 49(9), 6022-6028, <https://doi.org/10.1002/wrcr.20507>, 2013
- 65 Tague, C., & Grant, G. E.: A geological framework for interpreting the low-flow regimes of Cascade streams, Willamette River Basin, Oregon. *Water Resources Research*, 40(4), <https://doi.org/10.1029/2003WR002629>, 2004.
- Tashie, A., Pavelsky, T., & Band, L. E.: An empirical reevaluation of streamflow recession analysis at the continental scale. *Water Resources Research*, 56(1), e2019WR025448, <https://doi.org/10.1029/2019WR025448>, 2020.
- 70 Tashie, A., Scaife, C. I., & Band, L. E.: Transpiration and subsurface controls of streamflow recession characteristics. *Hydrological Processes*, 33(19), 2561-2575, <https://doi.org/10.1002/hyp.13530>, 2019.
- Yan, H., Hu, H., Liu, Y., Tudaji, M., Yang, T., Wei, Z., Chen, Z.: Characterizing the groundwater storage–discharge relationship of small catchments in China. *Hydrology Research*, 53(5), 782-794, <https://doi.org/10.2166/nh.2022.023>, 2022.
- Ye, S., Li, H. Y., Huang, M., Ali, M., Leng, G., Leung, L. R., Sivapalan, M. Regionalization of subsurface stormflow parameters of hydrologic models: Derivation from regional analysis of streamflow recession curves. *Journal of Hydrology*, 519, 670-682, <https://doi.org/10.1016/j.jhydrol.2014.07.017>, 2014.
- 75
